# Supplementary material for: Heterogeneous response and progression patterns reveal phenotypic heterogeneity of tyrosine kinase inhibitor response in metastatic renal cell carcinoma
Source: Springer Nature journal article supplement (doi:10.1186/s12916-016-0729-9), 2016-11-14

**Figure S1 – Response Heterogeneity.** All patient lesions as percentage change in diameter on CT scan relative to size at baseline until progressive disease.  
(R = right, L = left, P = patient, dash line = new lesion)

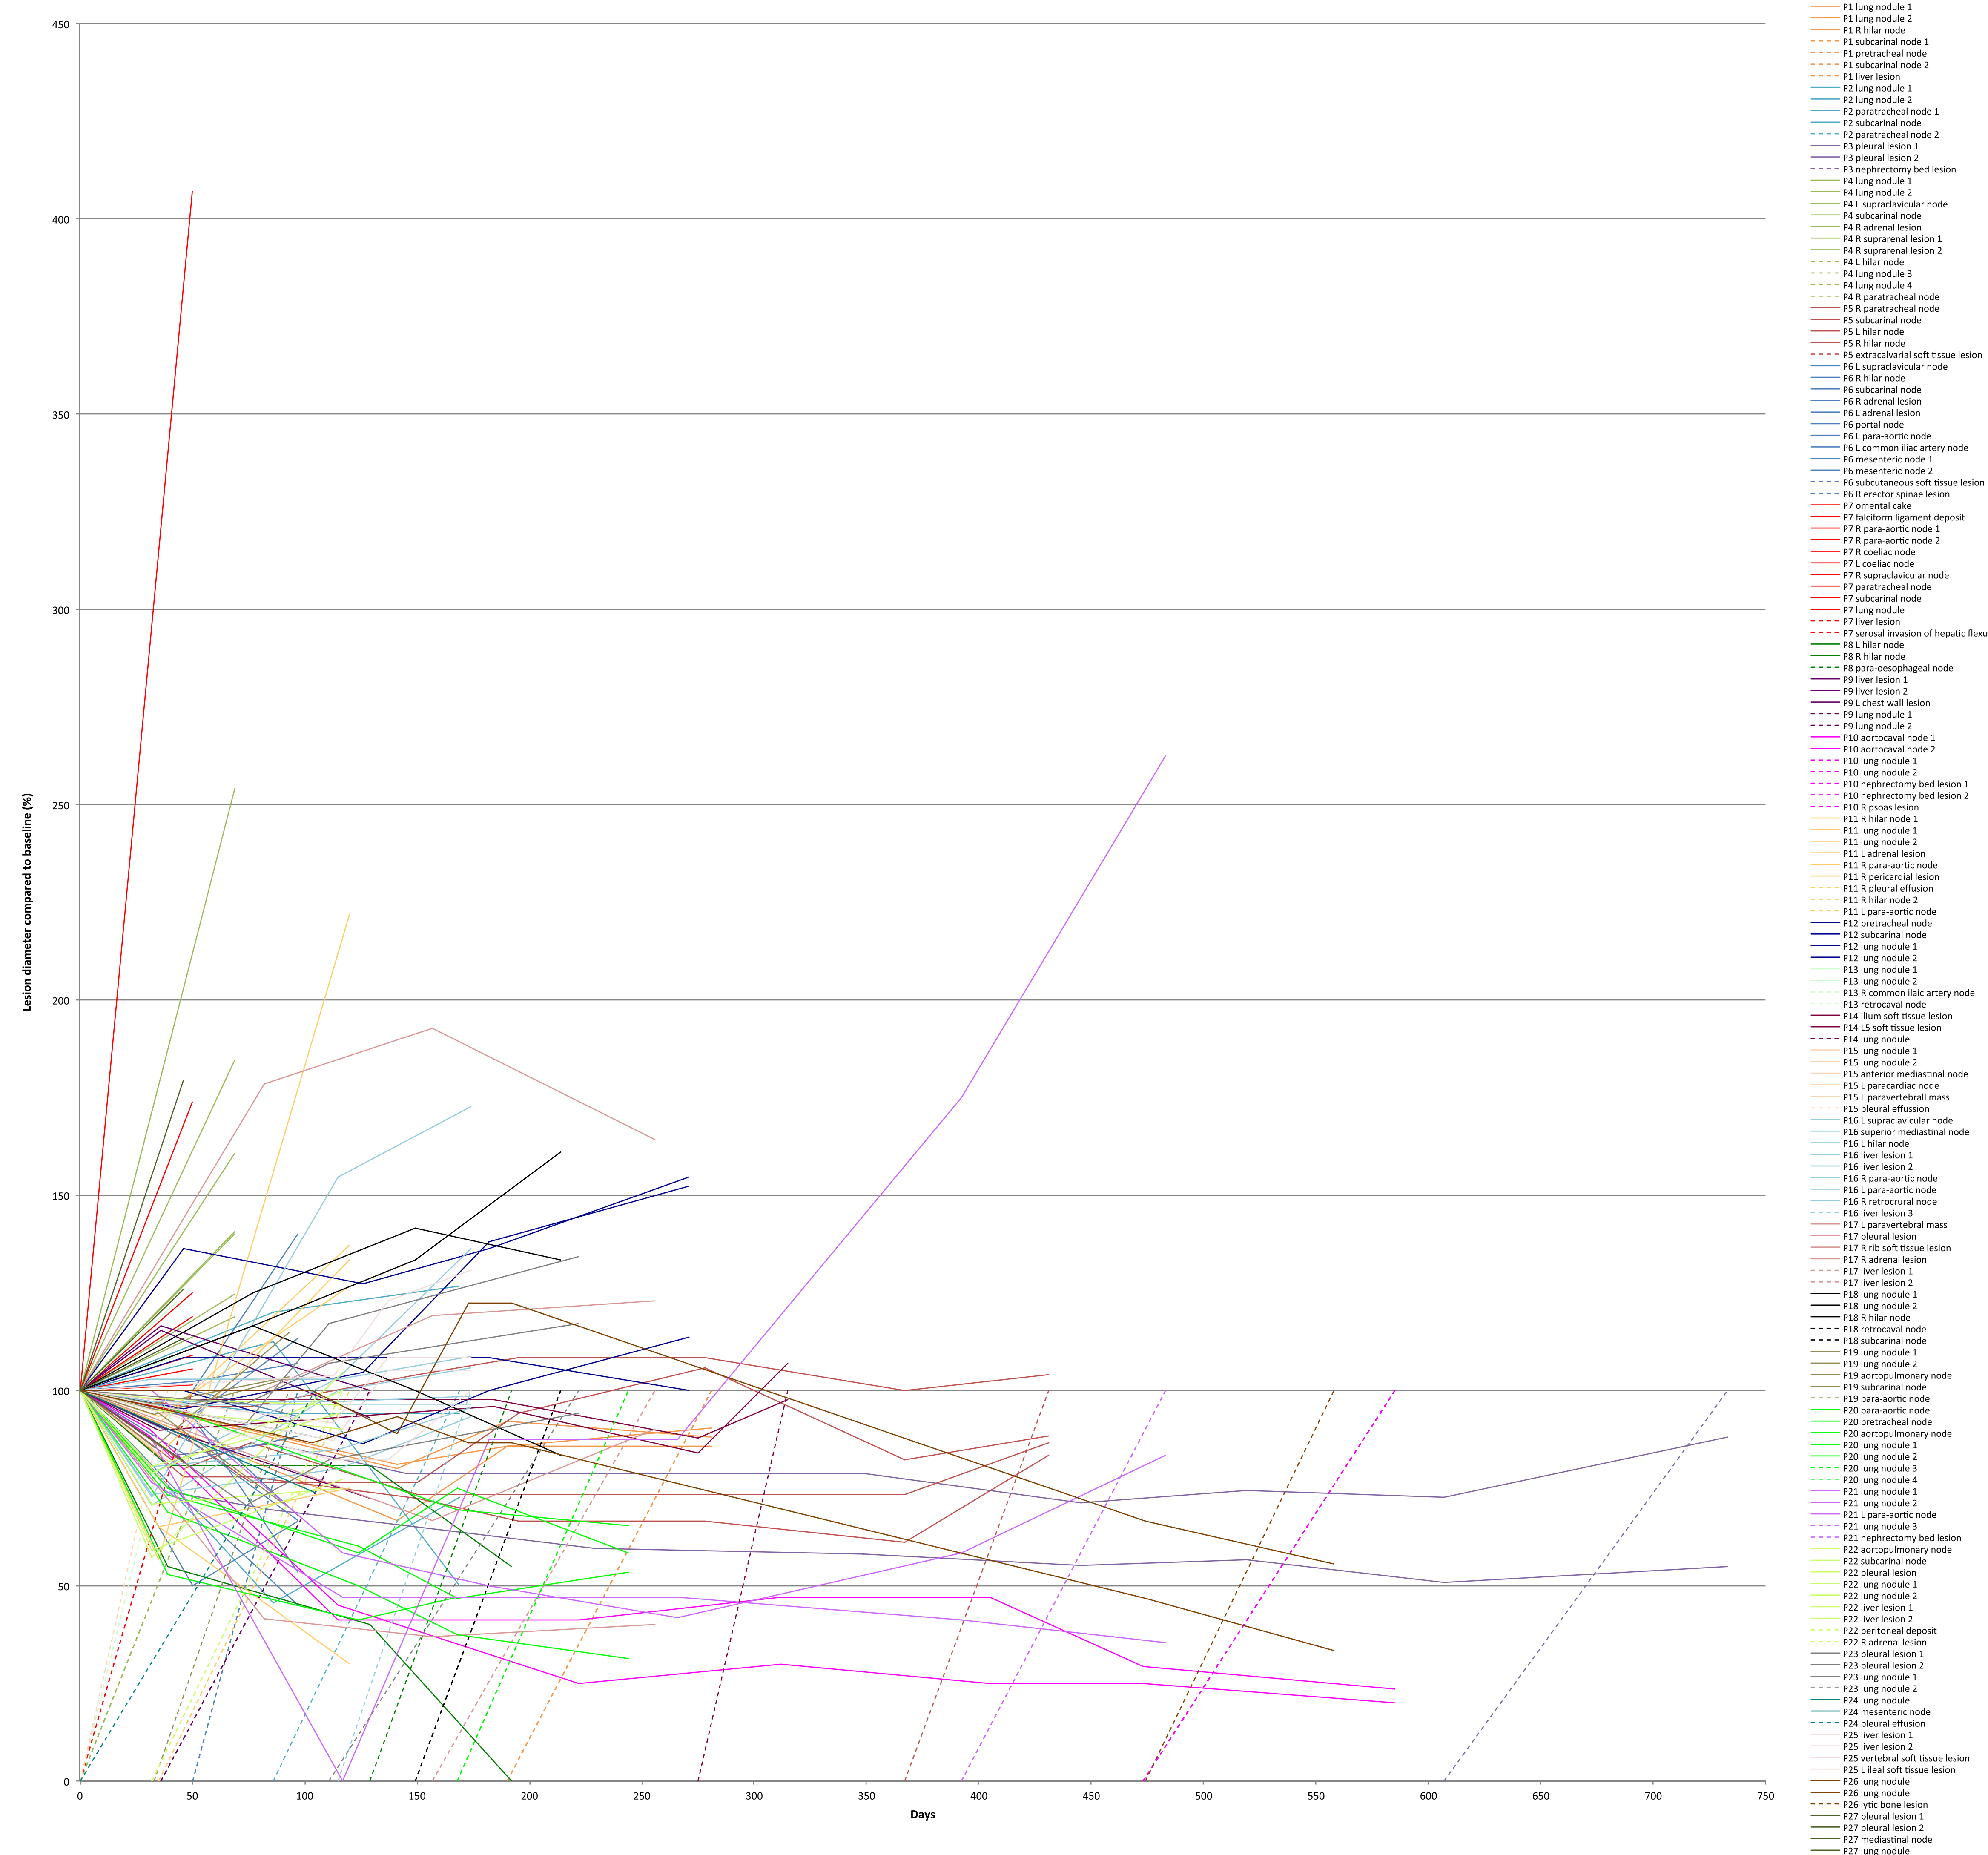

Supplement: MOESM2 [file 11044746]
