# Supplementary material for: Heterogeneous response and progression patterns reveal phenotypic heterogeneity of tyrosine kinase inhibitor response in metastatic renal cell carcinoma
Source: Springer Nature journal article supplement (doi:10.1186/s12916-016-0729-9), 2016-11-14

**Figure S2. Patient Graphs.** Percentage change in diameter on CT scan relative to size at baseline until RECIST progressive disease. (R = right, L = left, Green line = responding lesion at progression, blue line = stable lesion at progression, red line = progressing lesion at progression, grey line = new lesion(s))

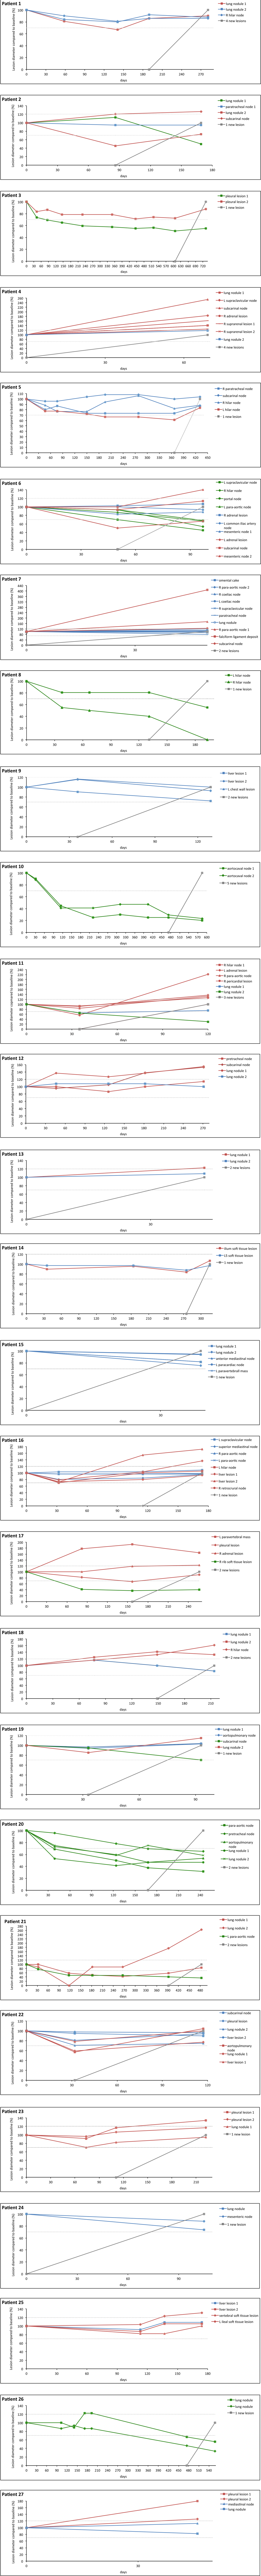

Supplement: MOESM4 [file 11044746]
